# Supplementary material for: Interfacial structure and orientation of confined ionic liquids on charged quartz surfaces
Source: Royal Society of Chemistry journal article supplement (doi:10.1039/c4cp03077j), 2014-01-01
Supplement: c4cp03077j1.pdf [file c4cp03077j1.pdf]

# Interfacial structure and orientation of confined ionic liquids on charged quartz surfaces

Yong-Lei Wang<sup>\*a</sup> and Aatto Laaksonen<sup>\*a,b</sup>

Received Xth XXXXXXXXXXXX 20XX, Accepted Xth XXXXXXXXXXXX 20XX

First published on the web Xth XXXXXXXXXXXX 200X

DOI: 10.1039/b000000x

## 1 Atomistic ionic liquid models

### 1.1 [BF<sub>4</sub>] anion

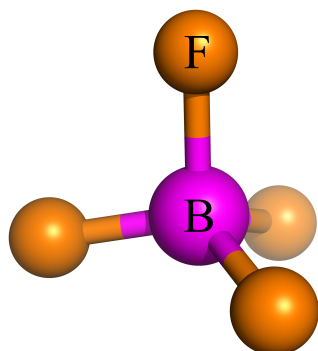

**Fig. S1** The [BF<sub>4</sub>] anion. The four F atoms connected to the central B atom are characterized with the same atom type.

**Table S1** Force field parameters of [BF<sub>4</sub>] anion<sup>1–3</sup>.

| Atoms | $\sigma_{ii}(\text{Å})$ | $\epsilon_{ii}(\text{kJ/mol})$ | Charge (e) |
|-------|-------------------------|--------------------------------|------------|
| B     | 3.5810                  | 0.3974                         | 1.1504     |
| F     | 3.1181                  | 0.2552                         | -0.5376    |

  

| Bonds | $r_0(\text{Å})$ | $K_r(\text{kJ/mol Å}^2)$ |
|-------|-----------------|--------------------------|
| B-F   | 1.389           | 1213.0                   |

  

| Angles | $\theta_0$ (deg) | $K_\theta(\text{kJ/mol rad}^2)$ |
|--------|------------------|---------------------------------|
| F-B-F  | 109.5            | 209.0                           |

<sup>a</sup> Department of Materials and Environmental Chemistry, Arrhenius Laboratory, Stockholm University, Stockholm S-106 91, Sweden; E-mail: yonglei.wang@mmk.su.se; aatto.laaksonen@mmk.su.se.

<sup>b</sup> Stellenbosch Institute of Advanced Studies (STIAS), Wallenberg Research Center, Stellenbosch University, Stellenbosch 7600, South Africa.

### 1.2 [PF<sub>6</sub>] anion

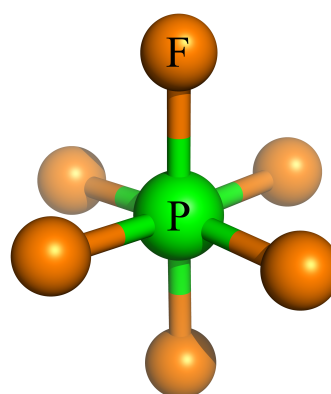

**Fig. S2** The [PF<sub>6</sub>] anion. The six F atoms connected to the central P atom are characterized with the same atom type.

**Table S2** Force field parameters of [PF<sub>6</sub>] anion<sup>1–3</sup>.

| Atom | $\sigma_{ii}(\text{Å})$ | $\epsilon_{ii}(\text{kJ/mol})$ | Charge (e) |
|------|-------------------------|--------------------------------|------------|
| P    | 3.7418                  | 0.8368                         | 0.7562     |
| F    | 3.1181                  | 0.2552                         | -0.2927    |

  

| Bonds | $r_0(\text{Å})$ | $K_r(\text{kJ/mol Å}^2)$ |
|-------|-----------------|--------------------------|
| P-F   | 1.600           | 795.0                    |

  

| Angles | $\theta_0$ (deg) | $K_\theta(\text{kJ/mol rad}^2)$ |
|--------|------------------|---------------------------------|
| F-P-F  | 90.0             | 334.7                           |

### 1.3 [TFO] anion

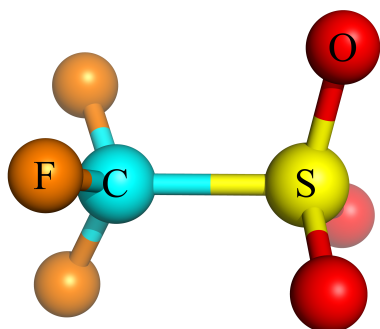

**Fig. S3** The [TFO] anion. The F atoms connected to the C atom, and the O atoms connected to the S atom, are characterized with the same atom type, respectively.

**Table S3** Force field parameters of [TFO] anion<sup>4</sup>.

| Atom | $\sigma_{ii}(\text{\AA})$ | $\varepsilon_{ii}(\text{kJ/mol})$ | Charge (e) |
|------|---------------------------|-----------------------------------|------------|
| C    | 3.4001                    | 0.2762                            | 0.4000     |
| F    | 3.1185                    | 0.2552                            | -0.1900    |
| S    | 3.3640                    | 1.0467                            | 1.0600     |
| O    | 2.9800                    | 0.8786                            | -0.6300    |

  

| Bonds | $r_0(\text{\AA})$ | $K_r(\text{kJ/mol \AA}^2)$ |
|-------|-------------------|----------------------------|
| C-F   | 1.340             | 1848.5                     |
| C-S   | 1.835             | 984.8                      |
| S-O   | 1.450             | 2664.2                     |

  

| Angles | $\theta_0(\text{deg})$ | $K_\theta(\text{kJ/mol rad}^2)$ |
|--------|------------------------|---------------------------------|
| F-C-F  | 107.6                  | 390.3                           |
| F-C-S  | 110.4                  | 346.9                           |
| C-S-O  | 102.6                  | 434.9                           |
| O-S-O  | 119.2                  | 484.7                           |

  

| Proper torsions | $\gamma(\text{deg})$ | $K_\phi(\text{kJ/mol})$ | n |
|-----------------|----------------------|-------------------------|---|
| F-C-S-O         | 0.0                  | 0.725                   | 3 |

### 1.4 [TF<sub>2</sub>N] anion

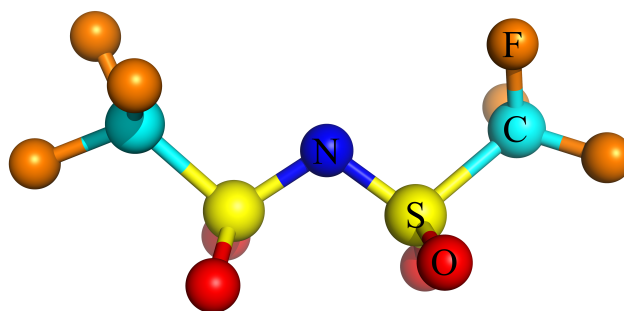

**Fig. S4** The [TF<sub>2</sub>N] anion. The F atoms connected to the C atoms and the O atoms connected to the S atoms are characterized with the same atom type, respectively.

**Table S4** Force field parameters of [TF<sub>2</sub>N] anion<sup>4</sup>.

| Atom | $\sigma_{ii}(\text{\AA})$ | $\varepsilon_{ii}(\text{kJ/mol})$ | Charge (e) |
|------|---------------------------|-----------------------------------|------------|
| N    | 3.2504                    | 0.7118                            | -0.7200    |
| S    | 3.3640                    | 1.0467                            | 0.9600     |
| O    | 2.9800                    | 0.8786                            | -0.5400    |
| C    | 3.4001                    | 0.2762                            | 0.5200     |
| F    | 3.1185                    | 0.2552                            | -0.1800    |

  

| Bonds | $r_0(\text{\AA})$ | $K_r(\text{kJ/mol \AA}^2)$ |
|-------|-------------------|----------------------------|
| N-S   | 1.600             | 1555.8                     |
| S-O   | 1.450             | 2664.2                     |
| S-C   | 1.835             | 984.8                      |
| C-F   | 1.340             | 1848.5                     |

  

| Angles | $\theta_0(\text{deg})$ | $K_\theta(\text{kJ/mol rad}^2)$ |
|--------|------------------------|---------------------------------|
| S-N-S  | 123.2                  | 167.6                           |
| N-S-O  | 113.6                  | 394.6                           |
| N-S-C  | 100.2                  | 407.8                           |
| O-S-O  | 119.2                  | 484.7                           |
| O-S-C  | 102.6                  | 434.9                           |
| S-C-F  | 110.4                  | 346.9                           |
| F-C-F  | 107.6                  | 390.3                           |

  

| Proper torsions | $\gamma(\text{deg})$ | $K_\phi(\text{kJ/mol})$ | n |
|-----------------|----------------------|-------------------------|---|
| S-N-S-O         | 0.0                  | -0.017                  | 3 |
| S-N-S-C         | 0.0                  | 32.758                  | 1 |
| S-N-S-C         | 0.0                  | 10.415                  | 2 |
| S-N-S-C         | 0.0                  | 3.195                   | 3 |
| N-S-C-F         | 0.0                  | 0.661                   | 3 |
| O-S-C-F         | 0.0                  | 0.725                   | 3 |

## 1.5 [BMIM] cation

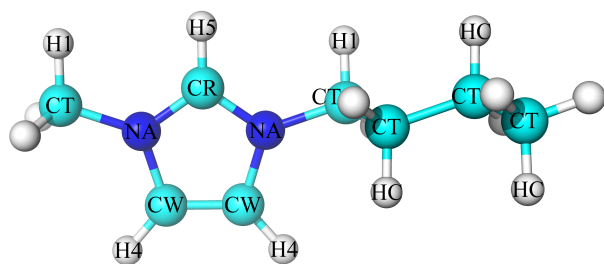

**Fig. S5** The [BMIM] cation. The hydrogen atoms connected to the same carbon atoms are characterized with the same atom type.

**Table S5** Force field parameters of [BMIM] cation<sup>1-3</sup>.

| Atom   | $\sigma_{ii}(\text{\AA})$ | $\epsilon_{ii}(\text{kJ/mol})$ | Charge (e) |
|--------|---------------------------|--------------------------------|------------|
| CR     | 3.400                     | 0.3598                         | -0.0055    |
| H5     | 1.782                     | 0.0628                         | 0.2258     |
| NA(m)  | 3.250                     | 0.7113                         | 0.0596     |
| CW(m)  | 3.400                     | 0.3598                         | -0.1426    |
| H4(m)  | 2.511                     | 0.0628                         | 0.2340     |
| CT(m)  | 3.400                     | 0.4577                         | -0.0846    |
| H1     | 2.471                     | 0.0657                         | 0.1085     |
| NA(b)  | 3.250                     | 0.7113                         | 0.0682     |
| CW(b)  | 3.400                     | 0.3598                         | -0.2183    |
| H4(b)  | 2.511                     | 0.0628                         | 0.2633     |
| CT(b1) | 3.400                     | 0.4577                         | -0.0153    |
| H1     | 2.471                     | 0.0657                         | 0.0796     |
| CT(b2) | 3.400                     | 0.4577                         | 0.0107     |
| HC     | 2.650                     | 0.0657                         | 0.0204     |
| CT(b3) | 3.400                     | 0.4577                         | 0.0309     |
| HC     | 2.650                     | 0.0657                         | 0.0157     |
| CT(b4) | 3.400                     | 0.4577                         | -0.0713    |
| HC     | 2.650                     | 0.0657                         | 0.0294     |

  

| Bonds | $r_0(\text{\AA})$ | $K_r(\text{kJ/mol \AA}^2)$ |
|-------|-------------------|----------------------------|
| CR-H5 | 1.070             | 1589.9                     |
| CR-NA | 1.322             | 1673.6                     |
| NA-CW | 1.378             | 1506.2                     |
| CW-CW | 1.343             | 1715.4                     |
| CW-H4 | 1.070             | 1610.8                     |
| NA-CT | 1.472             | 1171.5                     |
| CT-CT | 1.526             | 1297.0                     |
| CT-H1 | 1.080             | 1422.6                     |
| CT-HC | 1.090             | 1422.6                     |

| Angles   | $\theta_0$ (deg) | $K_\theta(\text{kJ/mol rad}^2)$ |
|----------|------------------|---------------------------------|
| CR-NA-CW | 108.0            | 502.0                           |
| CR-NA-CT | 126.3            | 209.0                           |
| NA-CR-NA | 109.9            | 502.0                           |
| NA-CR-H5 | 125.7            | 126.0                           |
| NA-CW-CW | 107.1            | 502.0                           |
| NA-CW-H4 | 122.1            | 126.0                           |
| NA-CT-H1 | 109.5            | 230.0                           |
| NA-CT-CT | 112.2            | 293.0                           |
| CW-NA-CT | 125.7            | 209.0                           |
| CW-CW-H4 | 130.7            | 126.0                           |
| CT-CT-CT | 109.5            | 167.0                           |
| CT-CT-H1 | 109.5            | 159.0                           |
| CT-CT-HC | 109.5            | 155.0                           |
| H1-CT-H1 | 109.5            | 146.0                           |
| HC-CT-HC | 109.5            | 142.0                           |

| Proper Torsions | $\gamma(\text{deg})$ | $K_\phi(\text{kJ/mol})$ | n |
|-----------------|----------------------|-------------------------|---|
| CR-NA-CW-CW     | 180.0                | 50.210                  | 2 |
| CR-NA-CW-H4     | 180.0                | 8.368                   | 2 |
| CR-NA-CT-CT     | 0.0                  | -0.987                  | 1 |
| CR-NA-CT-H1     | 0.0                  | 0.686                   | 3 |
| NA-CR-NA-CW     | 180.0                | 50.210                  | 2 |
| NA-CR-NA-CT     | 180.0                | 8.368                   | 2 |
| NA-CW-CW-NA     | 180.0                | 50.210                  | 2 |
| NA-CW-CW-H4     | 180.0                | 6.276                   | 2 |
| NA-CT-CT-CT     | 0.0                  | 1.046                   | 3 |
| NA-CT-CT-HC     | 0.0                  | 0.669                   | 3 |
| CW-NA-CR-H5     | 180.0                | 6.276                   | 2 |
| CW-NA-CT-CT     | 0.0                  | -0.745                  | 1 |
| CW-NA-CT-H1     | 0.0                  | 1.021                   | 3 |
| CW-CW-NA-CT     | 180.0                | 8.368                   | 2 |
| CT-NA-CR-H5     | 180.0                | 6.276                   | 2 |
| CT-NA-CW-H4     | 180.0                | 6.276                   | 2 |
| CT-CT-CT-CT     | 0.0                  | 1.046                   | 3 |
| CT-CT-CT-H1     | 0.0                  | 0.669                   | 3 |
| CT-CT-CT-HC     | 0.0                  | 0.669                   | 3 |
| H1-CT-CT-HC     | 0.0                  | 0.628                   | 3 |
| H4-CW-CW-H4     | 180.0                | 6.276                   | 2 |
| HC-CT-CT-HC     | 0.0                  | 0.628                   | 3 |

| Improper Torsions | $\gamma(\text{deg})$ | $K_\phi(\text{kJ/mol})$ | n |
|-------------------|----------------------|-------------------------|---|
| CR-CW-NA-CT       | 180.0                | 8.368                   | 2 |
| NA-NA-CR-H5       | 180.0                | 4.602                   | 2 |
| CW-NA-CW-H4       | 180.0                | 4.602                   | 2 |

## 2 Atomistic quartz model

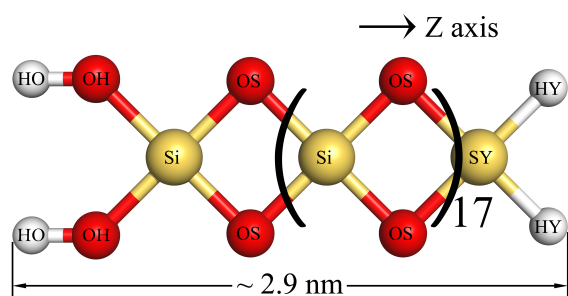

**Fig. S6** Schematic structures of quartz  $\text{Si}(\text{OH})_2$  and  $\text{SiH}_2$  surface models. The interpenetrating OS-Si-OS network in bulk quartz is simplified and represented by  $\text{Si}(\text{OS})_2$  groups.

**Table S6** Force field parameters of quartz  $\text{Si}(\text{OH})_2$  and  $\text{SiH}_2$  surface models<sup>5</sup>.

| Atom | $\sigma_{ii}(\text{\AA})$ | $\epsilon_{ii}(\text{kJ/mol})$ | Charge (e) |
|------|---------------------------|--------------------------------|------------|
| Si   | 3.920                     | 2.5104                         | 1.3333     |
| SY   | 3.920                     | 2.5104                         | 1.1223     |
| OS   | 3.367                     | 0.7109                         | -0.6797    |
| OH   | 3.442                     | 0.8799                         | -0.7707    |
| HO   | 0.000                     | 0.0000                         | 0.2893     |
| HY   | 2.511                     | 0.0657                         | 0.1552     |

  

| Bonds | $r_0(\text{\AA})$ | $K_r(\text{kJ/mol \AA}^2)$ |
|-------|-------------------|----------------------------|
| Si-OH | 1.680             | —                          |
| Si-OS | 1.635             | —                          |
| SY-OS | 1.635             | —                          |
| SY-HY | 1.486             | —                          |
| OH-HO | 0.975             | —                          |

  

| Angles   | $\theta_0(\text{deg})$ | $K_\theta(\text{kJ/mol rad}^2)$ |
|----------|------------------------|---------------------------------|
| Si-OS-Si | 162.2                  | —                               |
| Si-OS-SY | 162.2                  | —                               |
| OS-Si-OS | 111.4                  | —                               |
| OS-SY-OS | 111.4                  | —                               |
| OH-Si-OH | 117.0                  | —                               |
| OH-Si-OS | 126.0                  | —                               |
| Si-OH-HO | 122.5                  | —                               |
| HY-SY-OS | 118.0                  | —                               |
| HY-SY-HY | 111.1                  | —                               |

## 3 Functional form of potential energy

The force field for ionic liquid groups employs the following functional form for potential energy  $U$ :

$$\begin{aligned}
 U_{total} = & \sum_{bonds} K_r(r-r_0)^2 + \sum_{angles} K_\theta(\theta-\theta_0)^2 \\
 & + \sum_{torsions} \frac{K_\phi}{2} [1 + \cos(n\phi - \gamma)] \\
 & + \sum_{i<j} \left\{ 4\epsilon_{ij} \left[ \left( \frac{\sigma_{ij}}{r_{ij}} \right)^{12} - \left( \frac{\sigma_{ij}}{r_{ij}} \right)^6 \right] \right. \\
 & \left. + \frac{q_i q_j}{4\pi\epsilon_0\epsilon_r r_{ij}} \right\}. \quad (1)
 \end{aligned}$$

The first three terms represent the bonded interactions, *i.e.*, bonds, angles and torsions, and corresponding potential parameters have their usual meaning. The nonbonded interactions are described in the last term, including Van der Waals (VdW, here the Lennard-Jones 12-6 form) and Coulombic interactions of atom-centered point charges. The VdW interactions are calculated between atoms in different molecules or atoms in the same molecule that are separated by more than three consecutive bonds. The VdW interaction parameters between different atoms are obtained from the Lorentz-Berthelot combining rules with

$$\begin{aligned}
 \epsilon_{ij} &= \sqrt{\epsilon_{ii}\epsilon_{jj}}, \\
 \sigma_{ij} &= \frac{\sigma_{ii} + \sigma_{jj}}{2}. \quad (2)
 \end{aligned}$$

The nonbonded interactions separated by exactly three consecutive bonds (1-4 interaction) are reduced by related scaling factors, which are optimized as 0.50 for VdW interactions and 0.83 for electrostatic interactions, respectively.

## References

- Z. Liu, S. Huang and W. Wang, *J. Phys. Chem. B*, 2004, **108**, 12978–12989.
- Y.-L. Wang, A. Lyubartsev, Z.-Y. Lu and A. Laaksonen, *Phys. Chem. Chem. Phys.*, 2013, **15**, 7701–7712.
- Y.-L. Wang, A. Laaksonen and Z.-Y. Lu, *Phys. Chem. Chem. Phys.*, 2013, **15**, 13559–13569.
- X.-G. Xue, L. Zhao, Z.-Y. Lu and H.-J. Qian, *Chem. Res. Chin. Univ.*, 2013, **29**, 366–373.
- P. E. M. Lopes, V. Murashov, M. Tazi, E. Demchuk and A. D. MacKerell, *J. Phys. Chem. B*, 2006, **110**, 2782–2792.
